# Supplementary material
Source: publisher site journal article supplement (http://www.degruyter.com/publication/journal_key/ARCA/downloadAsset/ARCA_MLA%20REFERENCING%20STYLE_2021.pdf)
Supplement: Supplementary file 1 [file ARCA_MLA%20REFERENCING%20STYLE_2021.pdf]

**MLA REFERENCING STYLE**  
*arcadia*  
**International Journal of Literary Culture**

**NO FOOTNOTES OR ENDNOTES FOR REFERENCES.**

Footnotes only contain extra clarifications or extra detail that do not need to be included in your main text.

Footnotes should be used with restraint.

**Citing Sources in the Text**

- They should be included parenthetically in the text.
- They include a page reference and only so much further information that the reader can unambiguously identify the entry in your final "Works Cited" section. Usually a page number is enough. For instance: Smith wrote ... (page number). If it is not clear who the author is (Smith 7) if multiple works by one author are cited add the title (Smith, *On the Name* 7).

**Works Cited**

- References cited in the text must appear at the end of the paper in a Works Cited list.
- The list should provide full bibliographic information on every text quoted or discussed.
- DO NOT INCLUDE IN THE WORKS CITED ANY ITEMS NOT MENTIONED/QUOTED IN THE TEXT.
- Use *hanging indent* (under item "special" in paragraph); no empty lines between the items.
- If you use books in another language than that of your article please add the translation. For instance, if you write in English and use a French book: Bourdieu, Pierre. *Questions de sociologie* (Sociology in Question). Paris: Minuit, 2002.  
Optionally, you may then give the title of a published translation (especially useful if it does not exactly follow the original).
- Do not "customize" or change the keyboard.

**Books:**

- Last name, First name. *Title of Book*. Place of Publication: Publisher, Year of Publication.

**Articles in Volumes:**

- Last name, first name. "Title of article." *Title of volume*. Editor. Place of publication: Publisher, Year. Pages.

**Articles in Journals:**

- Last name, first name. "Title of Article." *Title of Journal*. Volume number. Issue Number (Year): Pages.

Please find examples below!

## Books:

|                                             |                                                                                                                                                                                                                    |
|---------------------------------------------|--------------------------------------------------------------------------------------------------------------------------------------------------------------------------------------------------------------------|
| One author:                                 | Nabokov, Vladimir. <i>Lolita</i> . New York: Putnam, 1955.                                                                                                                                                         |
| Another work, same author:                  | Nabokov, Vladimir. <i>Speak, Memory: An Autobiography Revisited</i> . New York: Knopf, 1999.                                                                                                                       |
| Two authors:                                | Cross, Susan, and Christine Hoffman. <i>Bruce Nauman: Theaters of Experience</i> . New York: Guggenheim Museum; London: Thames & Hudson, 2004.                                                                     |
| Three authors:                              | Lowi, Theodore, Benjamin Ginsberg, and Steve Jackson. <i>Analyzing American Government: American Government, Freedom and Power</i> . 3 <sup>rd</sup> ed. New York: Norton, 1994.                                   |
| More than three authors:                    | Gilman, Sander, et al. <i>Hysteria beyond Freud</i> . Berkeley: U of California P, 1993.                                                                                                                           |
| Corporate author:                           | Herbert F. Johnson Museum of Art. <i>A Guide to the Herbert F. Johnson Museum of Art, Cornell University</i> . Ithaca: Cornell UP, 1973.                                                                           |
| Multivolume work:                           | Morison, Samuel Eliot, Henry Steele Commager, and William E. Leuchtenburg. <i>The Growth of the American Republic</i> . 2 vols. New York: Oxford UP, 1980.                                                         |
| No author or editor:                        | <i>Peterson's Annual Guides to Graduate Study</i> . 33 <sup>rd</sup> ed. Princeton, NJ: Peterson's, 1999.                                                                                                          |
| Editor (anthology or collection of essays): | Hill, Charles A., and Marguerite Helmers, eds. <i>Defining Visual Rhetorics</i> . Mahwah, NJ: Lawrence Erlbaum Associates, 2004.                                                                                   |
| Foreign Books:                              | Bourdieu, Pierre. <i>Questions de sociologie</i> (Sociology in Question). Paris: Minuit, 2002.<br><br>Wang, Guowei. 王國維文學論著三種(Guowei Wangs drei Aufsätze über Literaturwissenschaft). Wuhu: Anhui Normal UP, 2014. |
| Translated Books:                           | Foucault, Michel. <i>Madness and Civilization. A History of Insanity in the Age of Reason</i> . Trans. Richard Howard. New York: Vintage and Random House, 1981.                                                   |

**Articles:**

|                                                                                                                                                                                                |                                                                                                                                                                                                                                                                                                                                                                                                                                                                                                                                                                                                                     |
|------------------------------------------------------------------------------------------------------------------------------------------------------------------------------------------------|---------------------------------------------------------------------------------------------------------------------------------------------------------------------------------------------------------------------------------------------------------------------------------------------------------------------------------------------------------------------------------------------------------------------------------------------------------------------------------------------------------------------------------------------------------------------------------------------------------------------|
| <p>Articles in Volumes:</p>                                                                                                                                                                    | <p>Ahmedi, Fauzia Erfan. "Welcoming Courtyards: Hospitality, Spirituality, and Gender." <i>Feminism and Hospitality: Gender in the Host/Guest Relationship</i>. Ed. Maurice Hamington. Lanham: Lexington Books, 2010. 109–24.</p>                                                                                                                                                                                                                                                                                                                                                                                   |
| <p>More than one article from the same edited collection (cross-references):</p> <p>Include a separate entry for the entire collection AND list each individual essay from the collection.</p> | <p>Neubauer, John, and Marcel Cornis-Pope, eds. <i>History of the Literary Cultures of East-Central Europe</i>. Vol. 5. <i>Junctures and Disjunctures in the 19<sup>th</sup> and 20<sup>th</sup> Centuries</i>. Amsterdam and Philadelphia: John Benjamins, 2010.</p> <p>Neubauer, John. "Petöfi: Self-Fashioning, Consecration, Dismantling." John Neubauer and Marcel Cornis-Pope, eds., <i>History of the Literary Cultures of East-Central Europe</i>. Vol. 1. 40–55.</p>                                                                                                                                       |
| <p>Articles in Journals:</p>                                                                                                                                                                   | <p>Matarrita-Cascante, David. "Beyond Growth: Reaching Tourism-Led Development." <i>Annals of Tourism Research</i> 37.4 (2010): 1141–63.</p> <p>Ramsey, Jarold. "Perversion of Manliness in Macbeth." <i>Elizabethan and Jacobean Drama</i>. Special issue of <i>Studies in English Literature 1500–1900</i> 13.2 (Spring 1973): 285–300.</p> <p>Jacke, Janina. „Unreliability and Narrator Types. On the Application Area of ‚Unreliable Narration‘.“ <i>Narrative Unreliability: Scope and Limits</i>. Hg. Matthias Aumüller. Sonderheft der Zeitschrift <i>Journal of Literary Theory</i> 12.1 (2018): 3–28.</p> |
| <p>Articles in Online Journals and Newspapers:</p>                                                                                                                                             | <p>Wood, James. "Books of the Year." <i>The New Yorker</i>, 17. Dec. 2012, <a href="http://newyorker.com/online/blogs/books/2012/12/james-woods-books-of-the-year.html">newyorker.com/online/blogs/books/2012/12/james-woods-books-of-the-year.html</a>. Accessed 11 Aug. 2016.</p> <p>Tew, Philip. "Will Self and Zadie Smith's Depictions of Post-Thatcherite London: Imagining Traumatic and Traumatological Space." <i>Études britanniques contemporaines</i> 47 (2014), <a href="http://ebc.revues.org/1886">ebc.revues.org/1886</a>. Accessed 28 Dec. 2015.</p>                                               |
